# Supplementary material
Source: HighWire-hosted journal article supplement (https://bmjopen.bmj.com/content/15/3/e092125)
Supplement: inline-supplementary-material-1 [file inline-supplementary-material-1.pdf]

**Appendix**

Dear patient,

We are investigators from the Ophthalmology Department of First Affiliated Hospital of Soochow University, and this questionnaire was designed by us to investigate the awareness of individuals underwent refractive surgery in our hospital and the guardians on surgeries for refractive errors (myopia). The data collected by this questionnaire are confidential, and your information will not be disclosed, so please don't worry about it. The data provided by you will only be used for the survey, which could help providing evidence for developing the scientific interventional strategies. To guarantee the validity of this survey, please answer the questions according to your own conditions. Thank you very much for making time to participate in this survey, and we appreciate your support and cooperation in this study very much!

☐ I am aware and consent that the data collected in this survey will be used for the scientific study.

Signature:

| The First Part: Basic information           |                                                                                                                                                                                                                                                                                                                                                                                                                                                                                                                                                                                                                 |
|---------------------------------------------|-----------------------------------------------------------------------------------------------------------------------------------------------------------------------------------------------------------------------------------------------------------------------------------------------------------------------------------------------------------------------------------------------------------------------------------------------------------------------------------------------------------------------------------------------------------------------------------------------------------------|
| 1. Your sex:                                | <div><div>a. Male</div><div>b. Female</div></div>                                                                                                                                                                                                                                                                                                                                                                                                                                                                                                                                                               |
| 2. Your age (years):                        | <div><div>a. &lt;20</div><div>b. 21-30</div><div>b. 31-40</div><div>c. 41-50</div><div>d. &gt;50</div></div>                                                                                                                                                                                                                                                                                                                                                                                                                                                                                                    |
| 3. Who is receiving the refractive surgery: | <div><div>a. Myself</div><div>b. My child</div></div>                                                                                                                                                                                                                                                                                                                                                                                                                                                                                                                                                           |
| 4. Registered residence:                    | <div><div>a. Agriculture</div><div>b. Non-agriculture</div></div>                                                                                                                                                                                                                                                                                                                                                                                                                                                                                                                                               |
| 5. Educational level:                       | <div><div>a. Junior middle school or lower</div><div>b. Senior middle school/ technical secondary school</div><div>c. Junior college/college</div><div>d. Postgraduate or higher</div></div>                                                                                                                                                                                                                                                                                                                                                                                                                    |
| 6. Occupation:                              | <div><div>a. Government administrators of the country or leaders of enterprises and public institutions</div><div>b. Professionals (teachers, engineering technicians, and writers, etc.)</div><div>c. Clerks or relevant personnel</div><div>d. Personnel in commercial business or service</div><div>e. Personnel in farming, forestry, animal husbandry, or fishery, etc.</div><div>f. Operators of production or transportation equipment, or relevant personnel</div><div>g. Army personnel</div><div>h. Housewife</div><div>i. Personnel in medical and relevant industry</div><div>j. Others</div></div> |

|                                                                                                                                                                |                                                                                                                                                                                       |
|----------------------------------------------------------------------------------------------------------------------------------------------------------------|---------------------------------------------------------------------------------------------------------------------------------------------------------------------------------------|
| 7. The monthly income of your family per capita in the past year (including physical income and rental income):_____ Yuan.                                     | a.<2000<br>b.2000-5000<br>c.5000-10000<br>d.10000-20000<br>e.>20000                                                                                                                   |
| 8. The degree of myopia before surgery (Please report the degree of your child if you are a parent): Left:_____degree; Right: _____degree.                     |                                                                                                                                                                                       |
| 9. Daily time of screen usage, including the use of cellphone, iPad, computer, or television, etc. (Please report the time of your child if you are a parent): | a. <2 h<br>b. 2-4 h<br>c. 4-6 h<br>d. >6h                                                                                                                                             |
| 10. Which are the reasons that you want to correct the visual acuity by refractive surgery?                                                                    | a. Remove the glasses and improve the appearance<br>b. Study in higher schools, job selection, or joining the army<br>c. Inconvenience in putting up and off the glasses<br>d. others |

---

**The Second Part: Knowledge on refractive (myopia) surgery**

---

K1. Refractive surgeries mainly include two types, i.e. corneal refractive surgery and implantable contact lens (ICL).

a. Right    b. Wrong    c. Unclear

---

K2. All myopia patients aged >18 years wanting to remove the glasses can receive refractive surgery.

a. Right    b. Wrong    c. Unclear

---

K3. Laser surgery for myopia is a “subtraction surgery”, while ICL is an “addition surgery”.

a. Right    b. Wrong    c. Unclear

---

K4. Patients need to stop wearing contact lenses before surgery. Generally, wearing of soft lenses (regular contact lenses) should be stopped for 1 week, hard lenses such as RGP should be stopped for 1 month, and orthokeratology lenses should be stopped for more than 3 months.

a. Right    b. Wrong    c. Unclear

---

K5. Range of diopters that can be corrected by excimer laser surgery: myopia less than 1200 degree, astigmatism less than 600 degree, and hyperopia less than 600 degree.

a. Right    b. Wrong    c. Unclear

---

K6. For excimer laser surgery, the cornea need to by >450 nm, and the anticipated thickness of residual corneal flap after the surgery is >250 um (>280 um is recommended), and should be >50% of the thickness before surgery.

a. Right    b. Wrong    c. Unclear

---

K7. For patients with relatively thin cornea, high degree of myopia, with no other contraindications, and meet the requirements of surgical parameters, semi-femtosecond laser surgery could be selected.

a. Right    b. Wrong    c. Unclear

---

K8. Full femtosecond laser surgery is not suitable for patients with astigmatism >50 degrees and corneal thickness below the required parameters, or myopia >1000 degrees.

a. Right    b. Wrong    c. Unclear

---

K9. Full femtosecond laser surgery is suitable for myope of 100-1000 degrees and astigmatism <500 degrees.

a. Right    b. Wrong    c. Unclear

---

K10. Full femtosecond laser surgery is suitable for patients loving strenuous exercises, fighting and boxing, and competitive sports, or specific

---

---

individuals.

a. Right b. Wrong c. Unclear

---

K11. ICL surgery has the characteristic of reversible and is suitable for correcting myopia with or without astigmatism. ICL surgery is the preferred method for correcting high-grade myopia >1000 degrees. Patients with moderate- or low-degree myopia that meeting the indications could select the method according to their own conditions.

a. Right b. Wrong c. Unclear

---

K12. The follows are complications of risks after refractive surgery: 1) xerophthalmia; 2) corneal subepithelial haze; 3) infection; 4) refractive regression, and become myopia again; 5) difficult in reading; 6) residual diopters after surgery; 7) dry eyes; 8) dazzling; and 9) reduced night vision, and difficult in driving in the night. How many of them do you know?

a.  $\geq 7$ ; b. 5-7; c. 1-4; d. none at all

---

K13. For superficial excimer laser surgery (such as LASEK or TPRK, etc.), the degree of correction should be no higher than 800 degrees. The surgery is more suitable for several specific conditions, such as patients with corneal scars and opacities, or epithelial basement membrane dystrophy. However, the discomfort in the eyes after surgery is substantial, the recovery cycle is relatively long, and the patients have the risk of corneal stroma opacity.

a. Right b. Wrong c. Unclear

---

K14. The range of diopters that can be corrected by semi-femtosecond laser surgery is large, during the process femtosecond laser is required to make the flaps, and the postoperative risk of corneal complications is higher than other correction methods. Impact by accident or trauma of the eyes after surgery could potentially damage the cornea, and emergent treatment is needed for severe cases.

a. Right b. Wrong c. Unclear

---

K15. Full femtosecond SMILE surgery involves minimally invasive injury (the smallest is 2 cm), the process of surgery is fast, the effective capsulorhexis area is large, and the cornea is safe and stable after surgery.

a. Right b. Wrong c. Unclear

---

**The Third Part Attitude on refractive (myopia) surgery**

- A1. Your awareness on refractive surgery.  
a. Highly unaware;    b. Unaware;    c. Fair;    d. Aware;    e. Highly aware
- A2. Are you satisfied to the preoperative examination processes?  
a. Highly satisfied;    b. Satisfied;    c. Fair;    d. Unsatisfied;    e. Highly unsatisfied
- A3. Are you satisfied to the explanations by the personnel from the hospital?  
a. Highly satisfied;    b. Satisfied;    c. Fair;    d. Unsatisfied;    e. Highly unsatisfied
- A4. Do you agree that you have fully understood the detailed processes of this surgery before the surgery?  
a. Highly agree;    b. Agree;    c. Fair;    d. Disagree;    e. Highly disagree
- A5. Do you agree that you think you have selected the most suitable surgical type?  
a. Highly agree;    b. Agree;    c. Fair;    d. Disagree;    e. Highly disagree
- A6. Do you agree that in your case, the advantages of the myopia correction surgery overwhelm the disadvantages?  
a. Highly agree;    b. Agree;    c. Fair;    d. Disagree;    e. Highly disagree
- A7. Do you agree that advertisements could influence you in understanding the myopia correction surgeries?  
a. Highly agree;    b. Agree;    c. Fair;    d. Disagree;    e. Highly disagree
- A8. How do you think the effects of the myopia surgery?  
a. Highly effective, and the visual acuity recovered to normal level;    b. Effective but not very substantial;    c. Effective but with substantial side effects;    d. Effective, but refractive regression occurred;    e. Not effective at all
- A9. Will you recommend the myopia correction surgery to your friends with myopia?  
a. Strongly recommend;    b. Recommend;    c. Fair;    d. Not recommend;    e. Highly not recommend
